# Supplementary material for: Nitric oxide down-regulates voltage-gated Na+ channel in cardiomyocytes via transcriptional S-nitrosylation signaling pathway
Source: Research Square preprint supplement (doi:10.21203/rs.3.rs-155898/v1), 2021-02-17
Supplement: Supplementary file 1 [file c7d6cb4c8da5c59703fa107f.pdf]

# Nitric oxide down-regulates voltage-gated Na<sup>+</sup> channel in cardiomyocytes via transcriptional S-nitrosylation signaling pathway

Pu Wang<sup>1,2</sup>, Mengyan Wei<sup>1,2</sup>, Xiufang Zhu<sup>1,2</sup>, Yangong Liu<sup>1,2</sup>, Kenshi Yoshimura<sup>2</sup>, Mingqi Zheng<sup>1</sup>, Gang Liu<sup>1</sup>, Shinichiro Kume<sup>2</sup>, Masaki Morishima<sup>3</sup>, Tatsuki Kurokawa<sup>2</sup>, Katsushige Ono<sup>2</sup>

<sup>1</sup>Department of Cardiology, The First Hospital of Hebei Medical University, 89 Donggang Road, Shijiazhuang, Hebei Province 050031, People's Republic of China

<sup>2</sup>Department of Pathophysiology, Oita University School of Medicine, Yufu, Oita 879-5593, Japan

<sup>3</sup>Department of Food Science and Nutrition, Faculty of Agriculture, Kindai University, Nara, Japan

Correspondence: Katsushige Ono, ono@oita-u.ac.jp

## Supplemental Data

Nav1.5

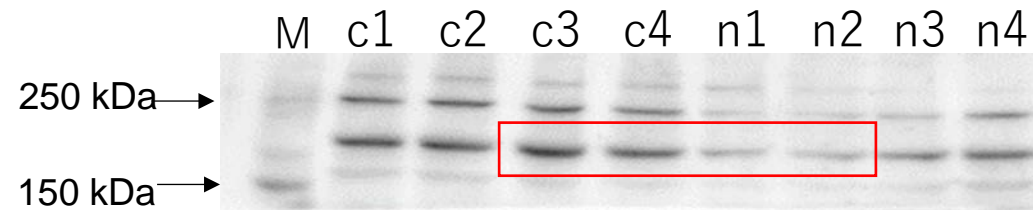

FOXO1

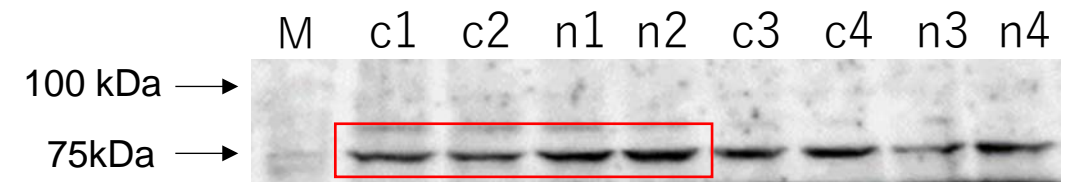

GAPDH

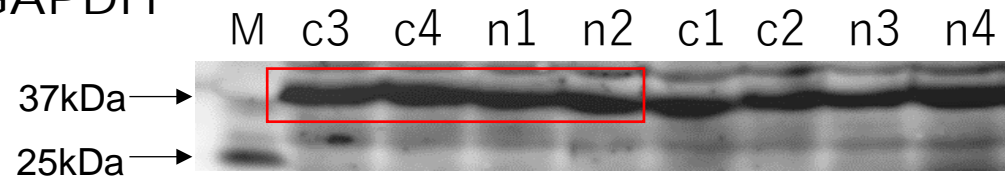

GAPDH

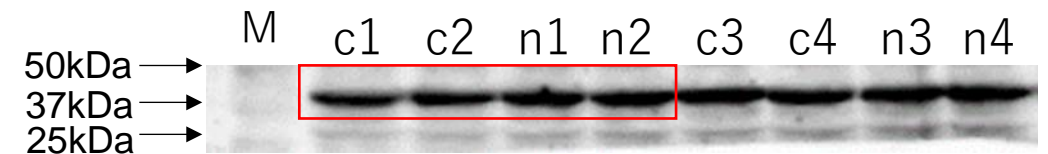

Western blot in Figure 7 corresponds to this slide data indicated by red box. Blot labels c and n represent vehicle (c) and NOC-18 (n), respectively. Blot data c3 and c4 were used for vehicle and n1 and n2 were used for NOC-18 in Figure 7B.
